# Supplementary material for: Regioselective green synthesis of some novel indole-substituted 1H-benzo[f]chromenes via one-pot three-component reactions in water–ethanol media
Source: Royal Society of Chemistry journal article supplement (doi:10.1039/d6ra02182d), 2026-04-02
Supplement: d6ra02182d1.pdf [file d6ra02182d1.pdf]

### Supplementary data

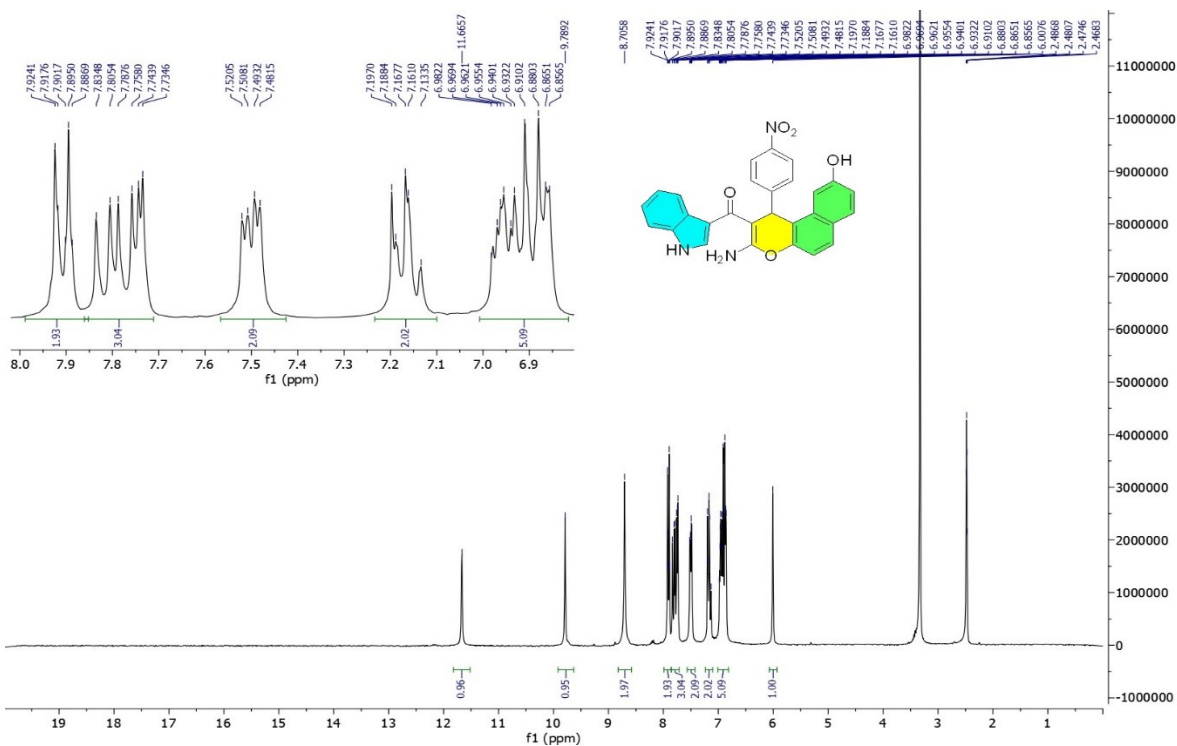

**<sup>1</sup>H-NMR spectrum of 4a (300 MHz, DMSO-*d*<sub>6</sub>)**

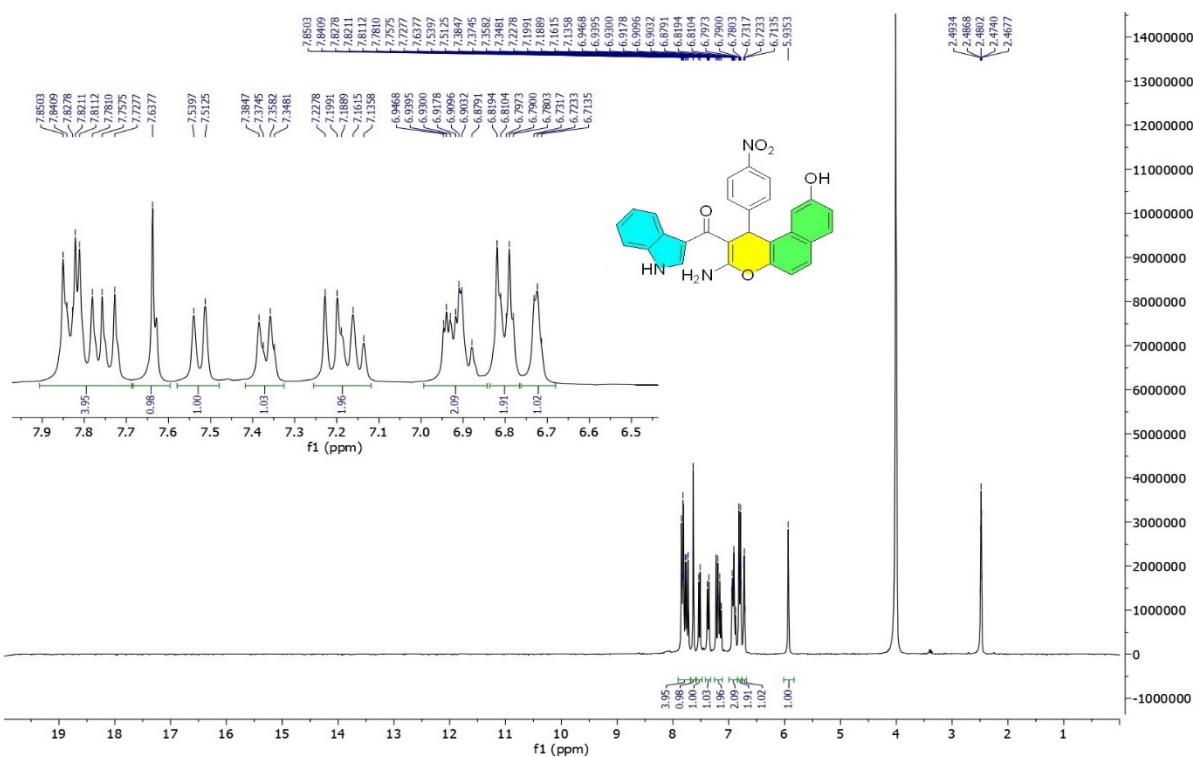

**<sup>1</sup>H-NMR spectrum of 4a (300 MHz, DMSO-*d*<sub>6</sub> + D<sub>2</sub>O)**

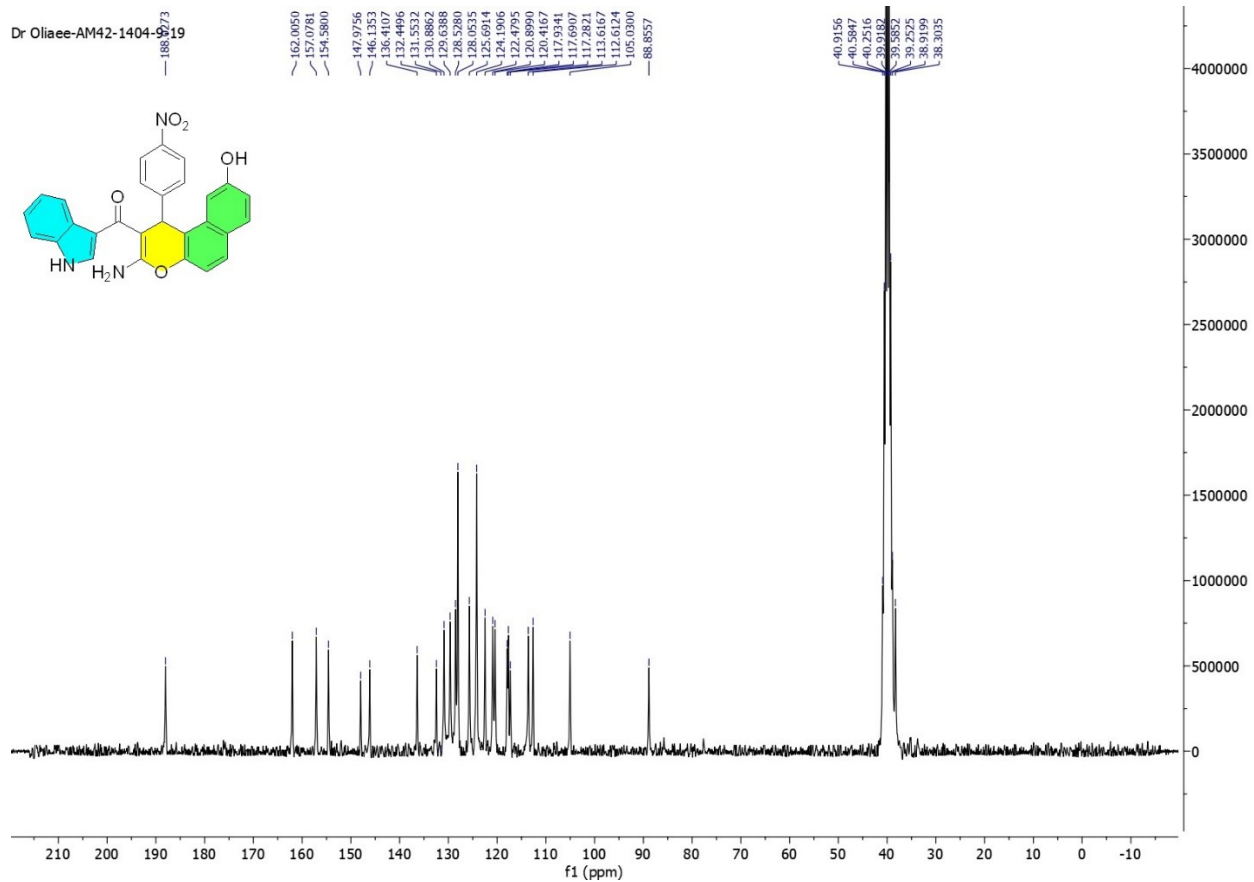

$^{13}\text{C-NMR}$  spectrum of **4a** (75 MHz, DMSO- $d_6$ )



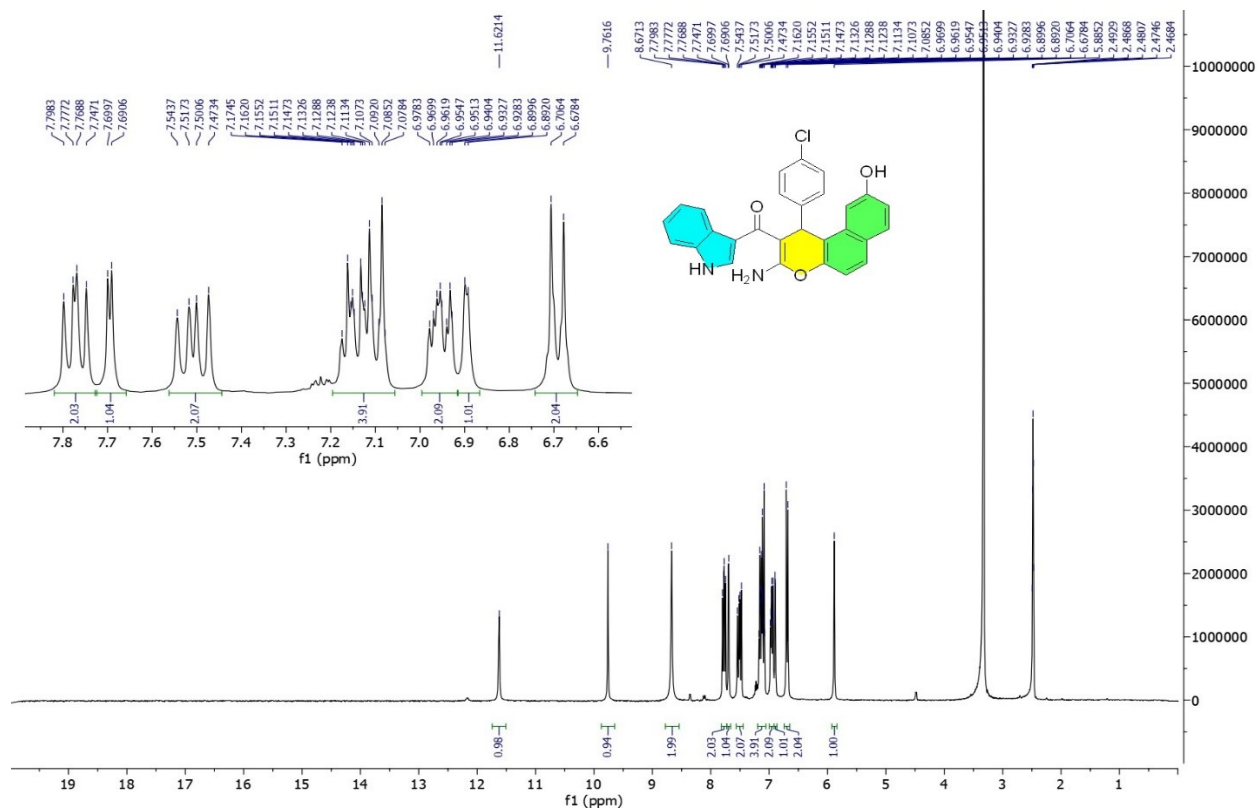

**<sup>1</sup>H-NMR spectrum of 4c (300 MHz, DMSO-*d*<sub>6</sub>)**

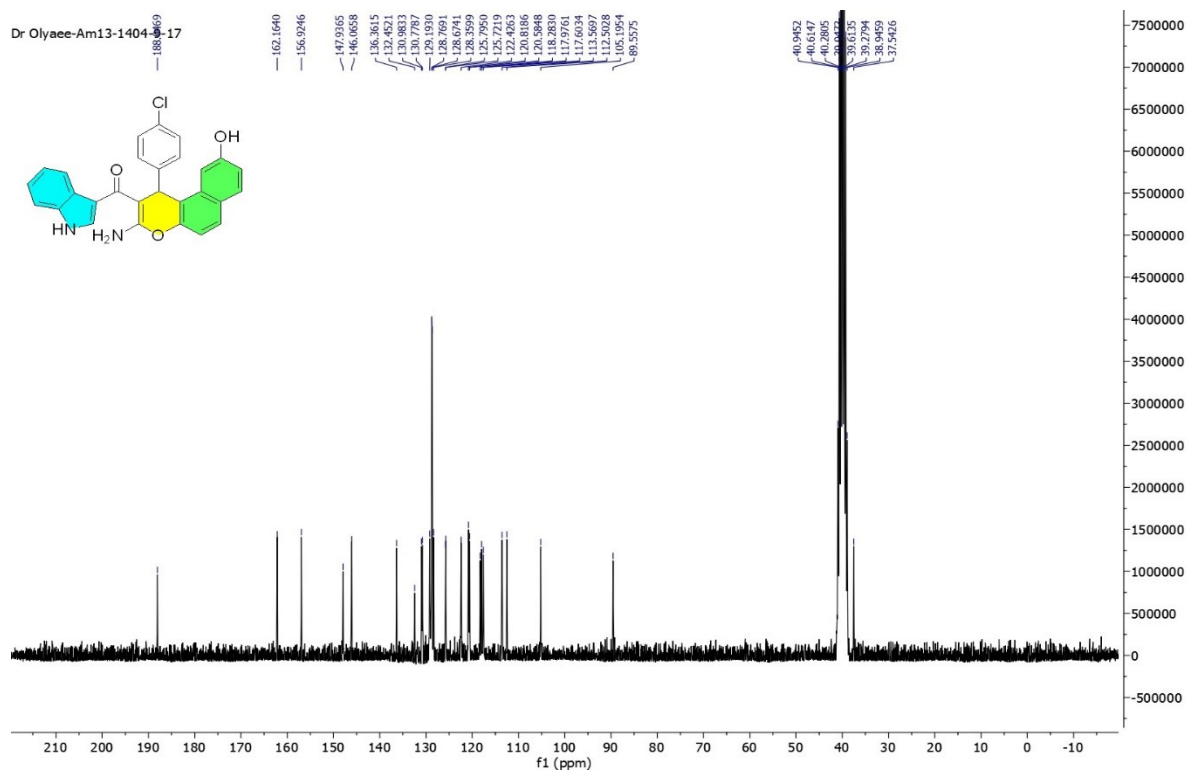

**<sup>13</sup>C-NMR spectrum of 4c (75 MHz, DMSO-*d*<sub>6</sub>)**

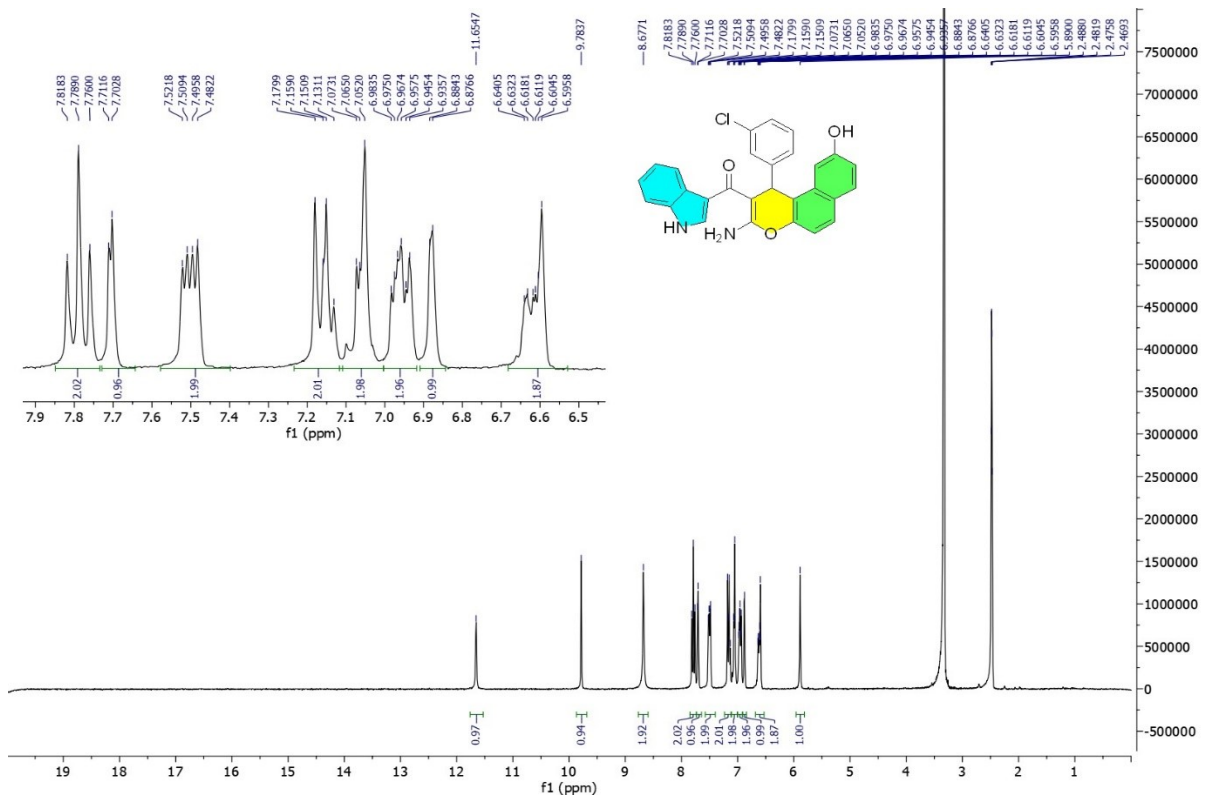

<sup>1</sup>H-NMR spectrum of 4d (300 MHz, DMSO-*d*<sub>6</sub>)

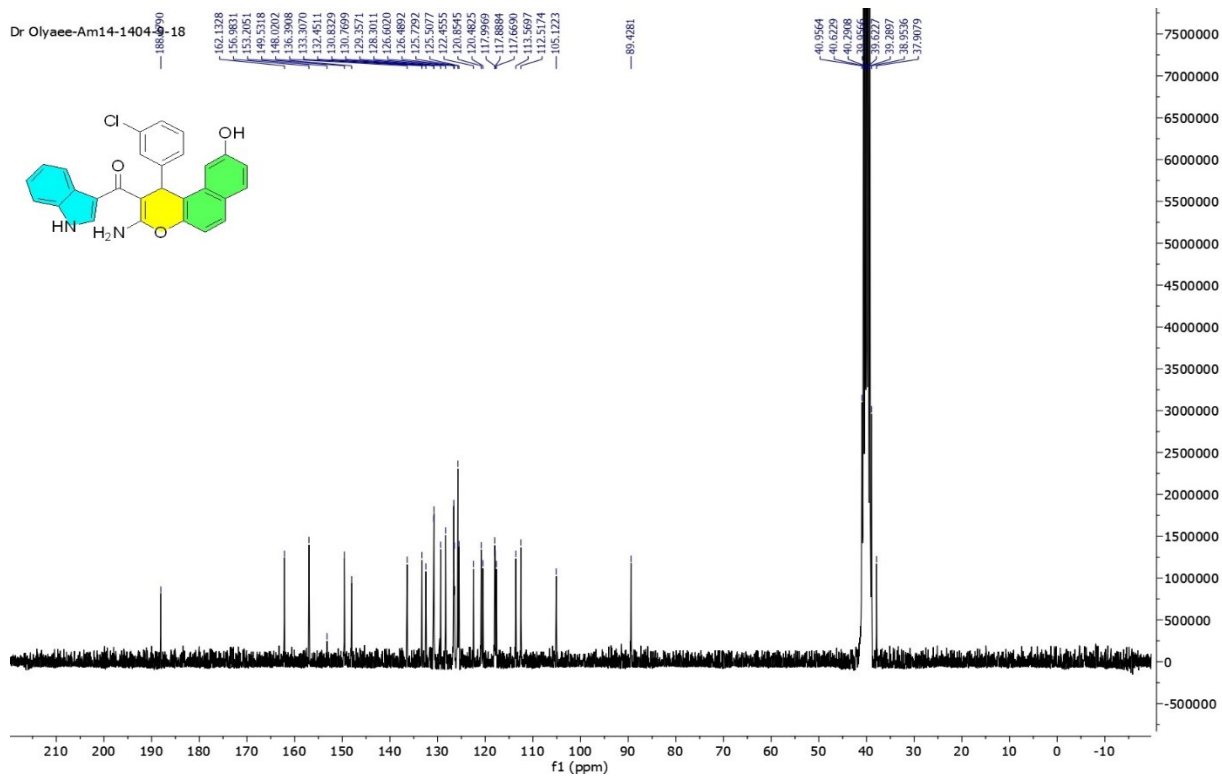

<sup>13</sup>C-NMR spectrum of 4d (75 MHz, DMSO-*d*<sub>6</sub>)

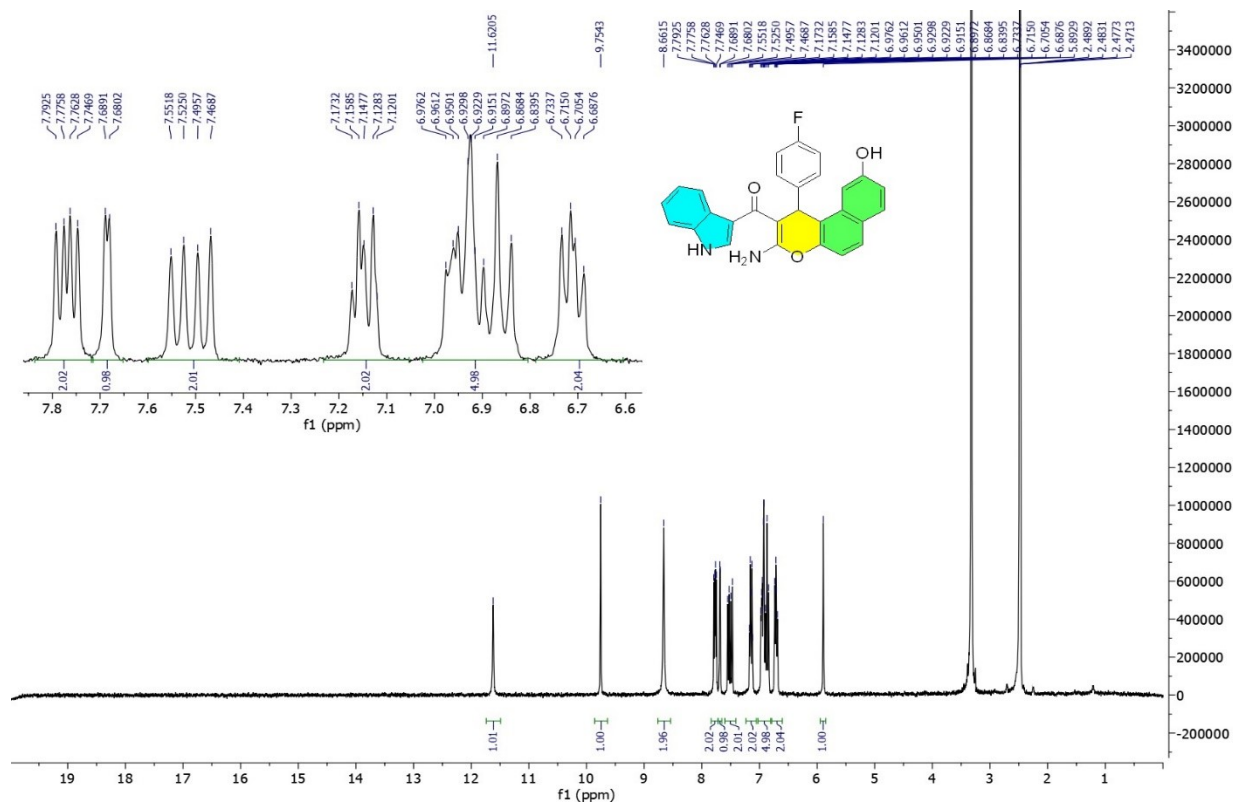

**<sup>1</sup>H-NMR spectrum of 4e (300 MHz, DMSO-*d*<sub>6</sub>)**

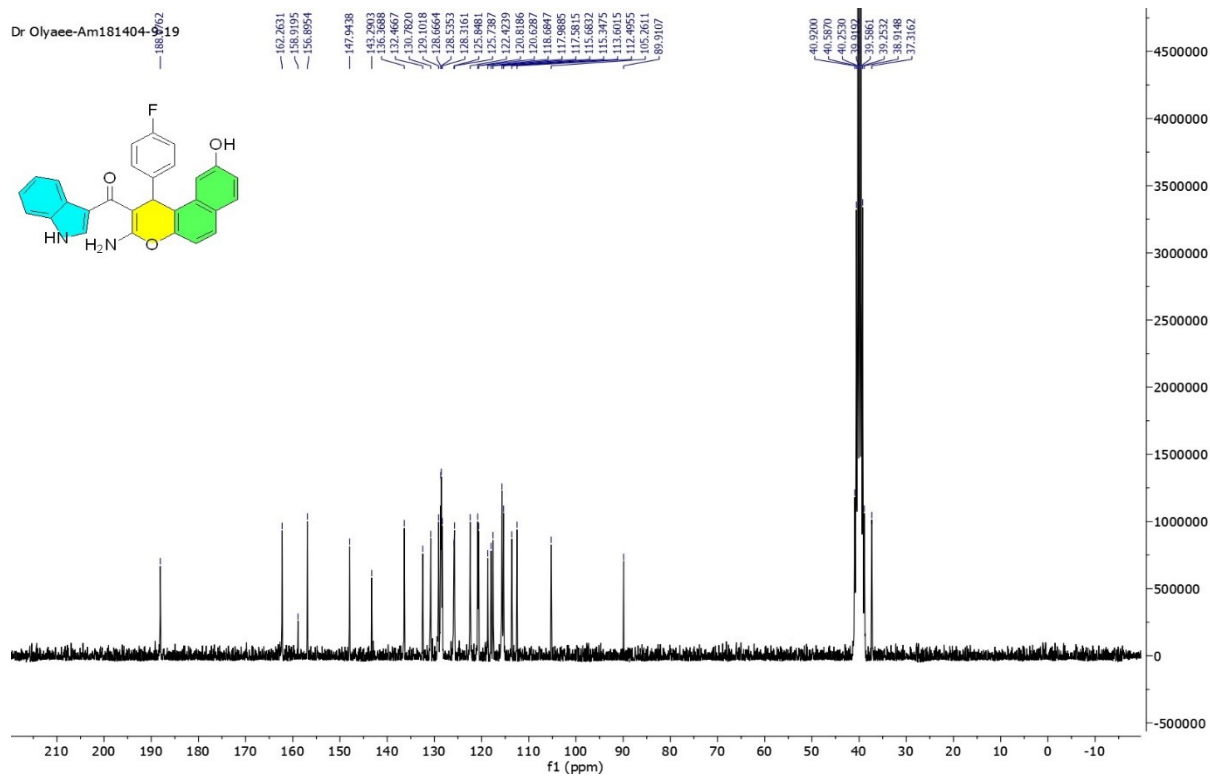

**<sup>13</sup>C-NMR spectrum of 4e (75 MHz, DMSO-*d*<sub>6</sub>)**



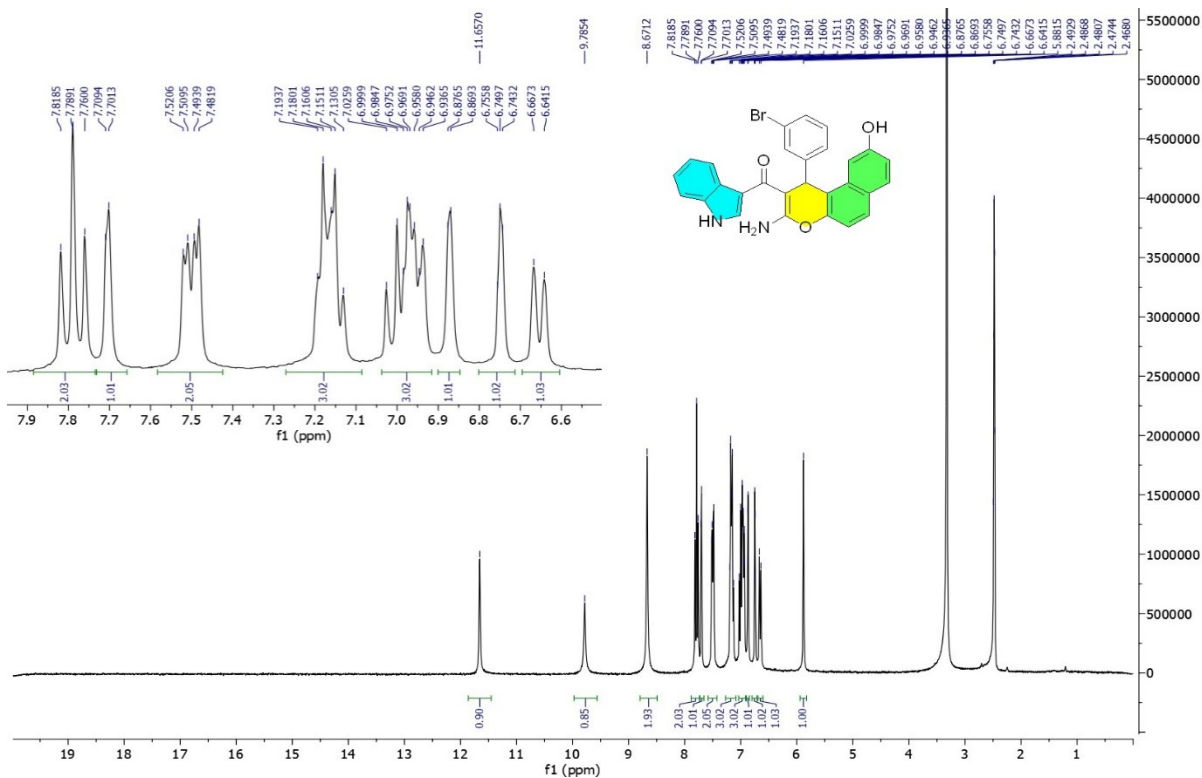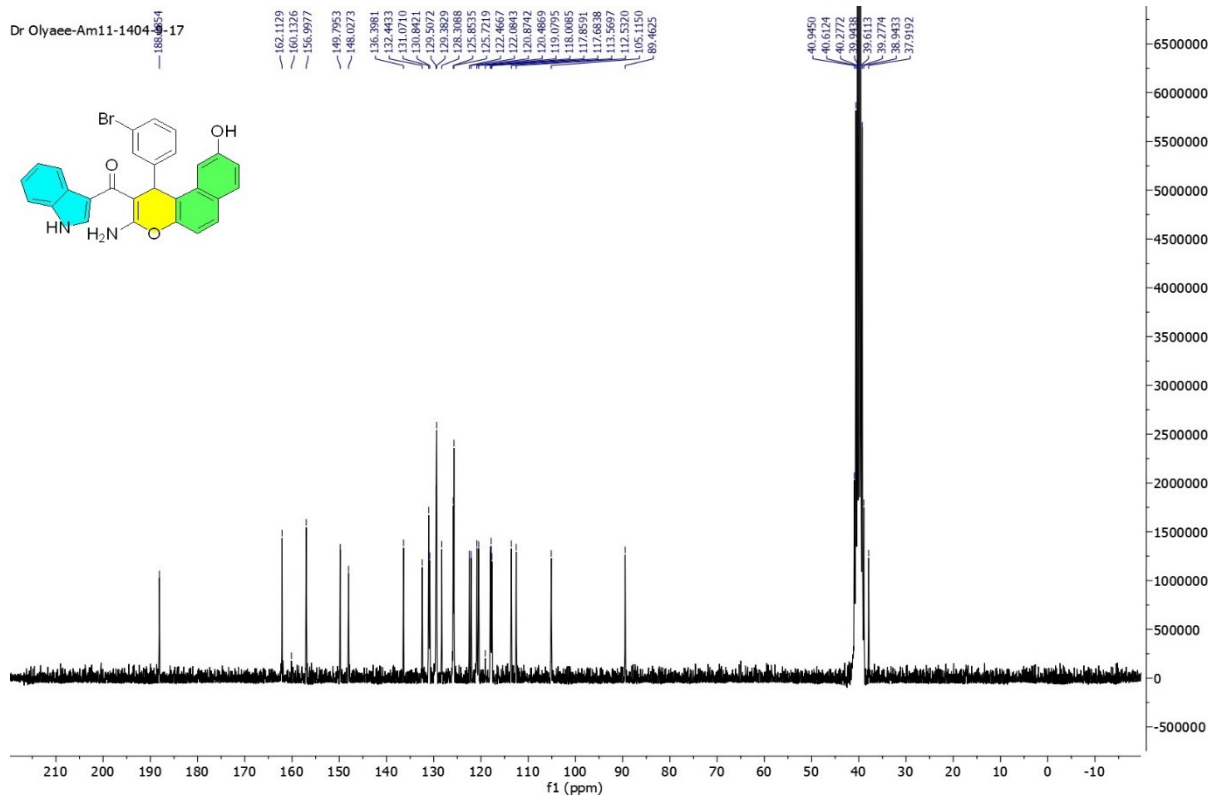

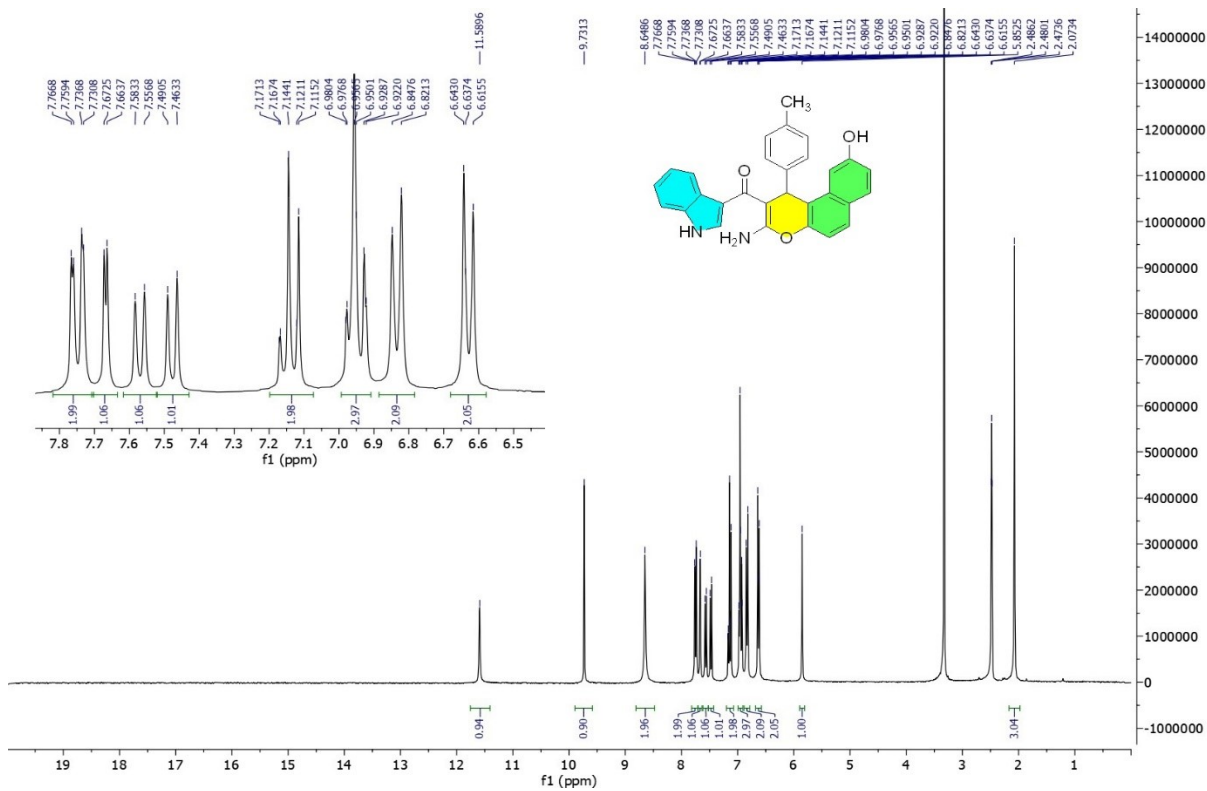

**<sup>1</sup>H-NMR spectrum of 4h (300 MHz, DMSO-d<sub>6</sub>)**

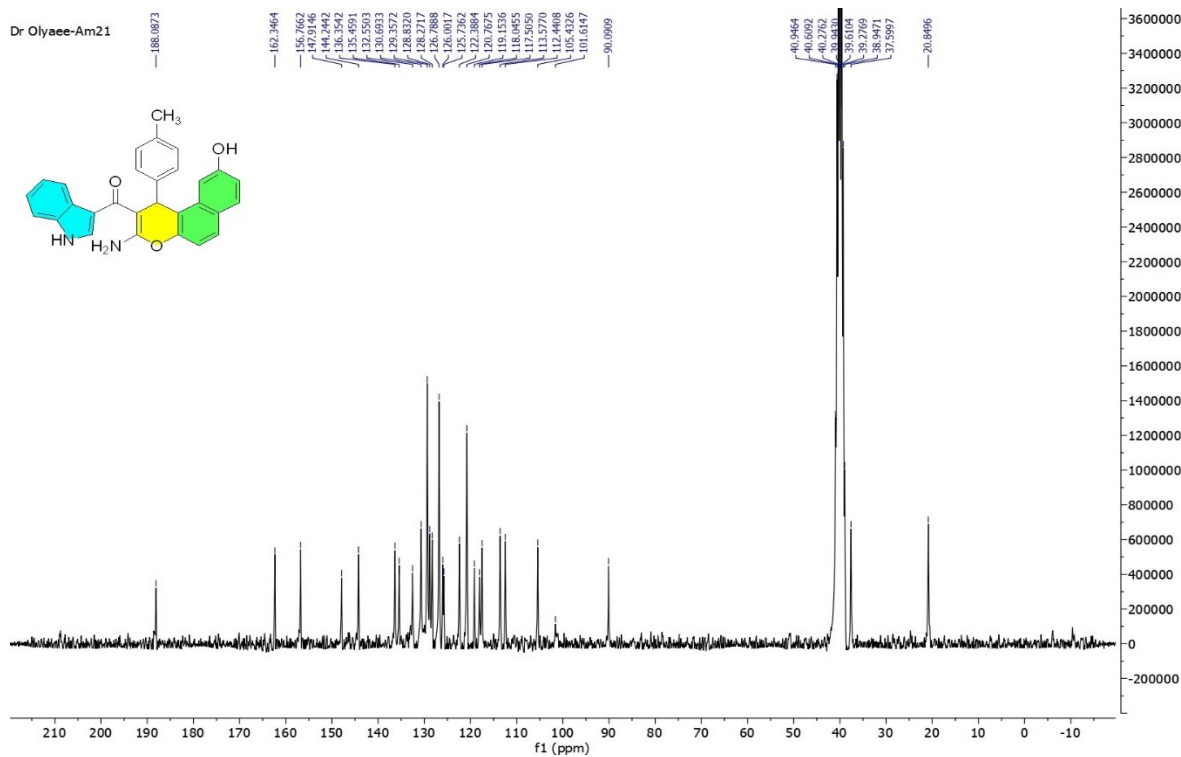

**<sup>13</sup>C-NMR spectrum of 4h (75 MHz, DMSO-d<sub>6</sub>)**

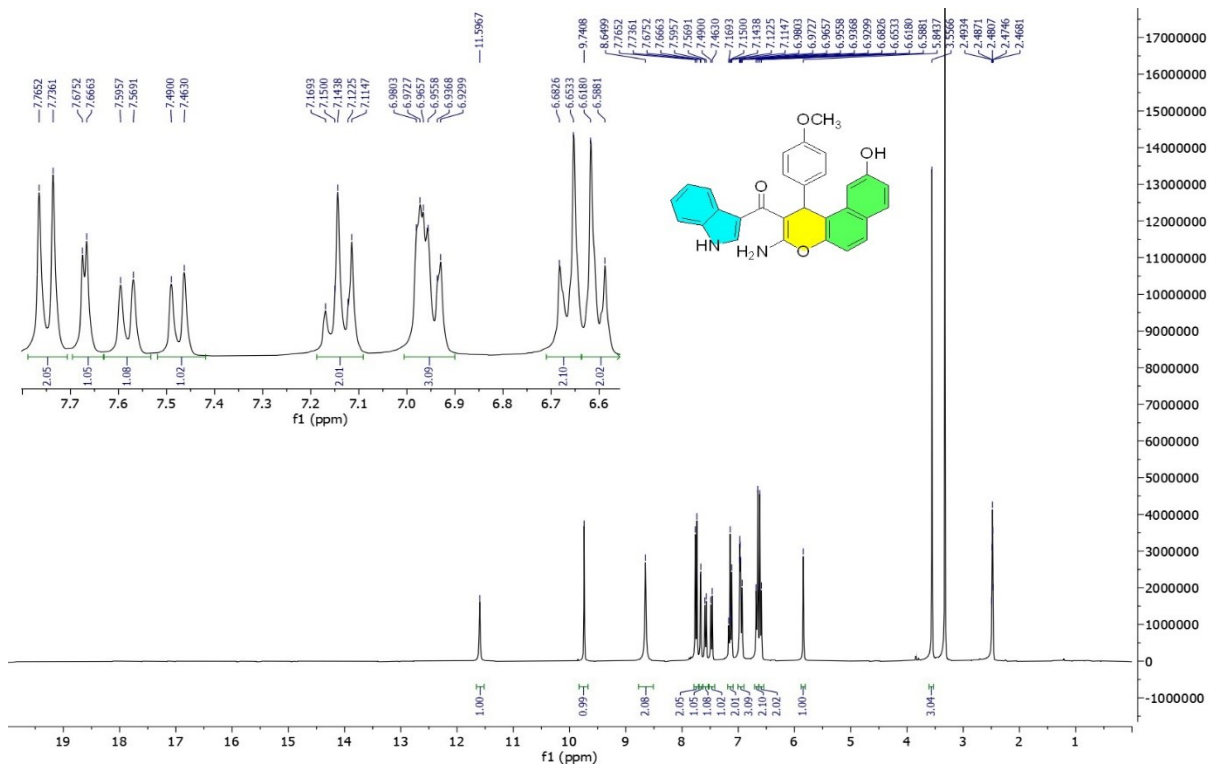

**<sup>1</sup>H-NMR spectrum of 4i (300 MHz, DMSO-*d*<sub>6</sub>)**

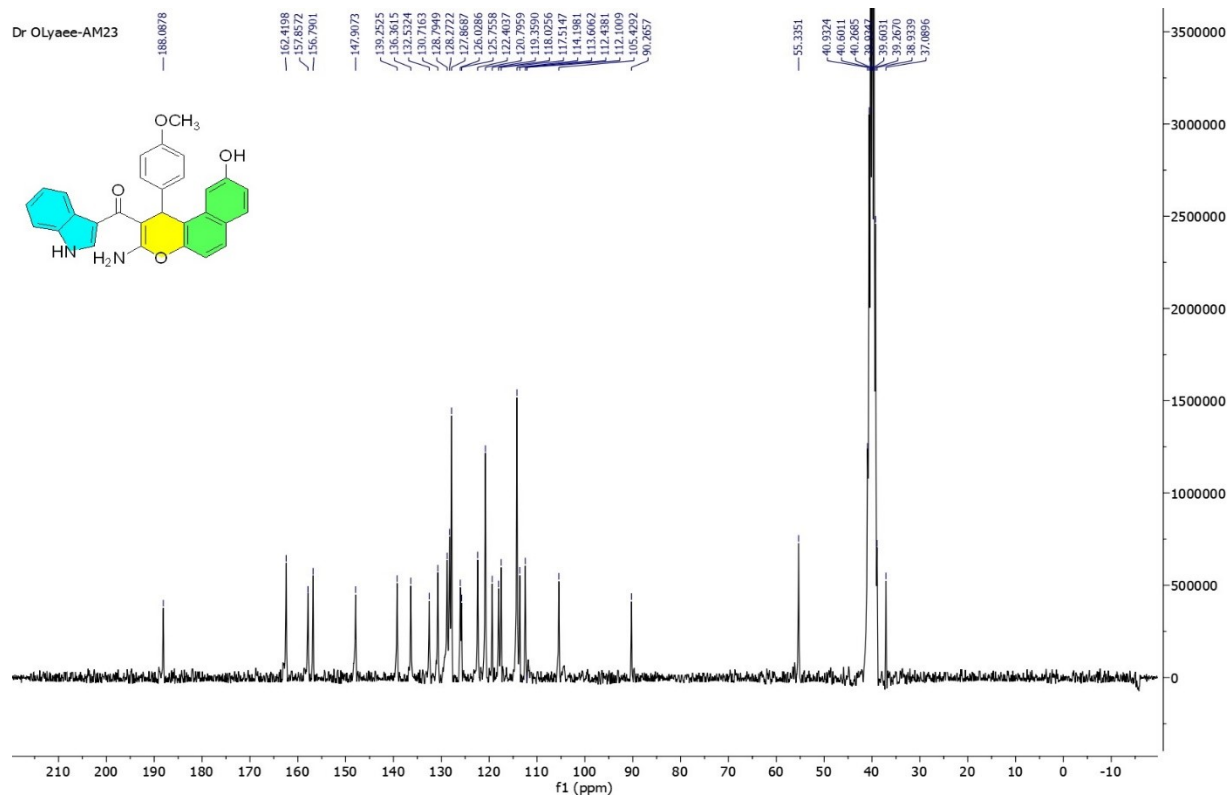

**<sup>13</sup>C-NMR spectrum of 4i (75 MHz, DMSO-*d*<sub>6</sub>)**

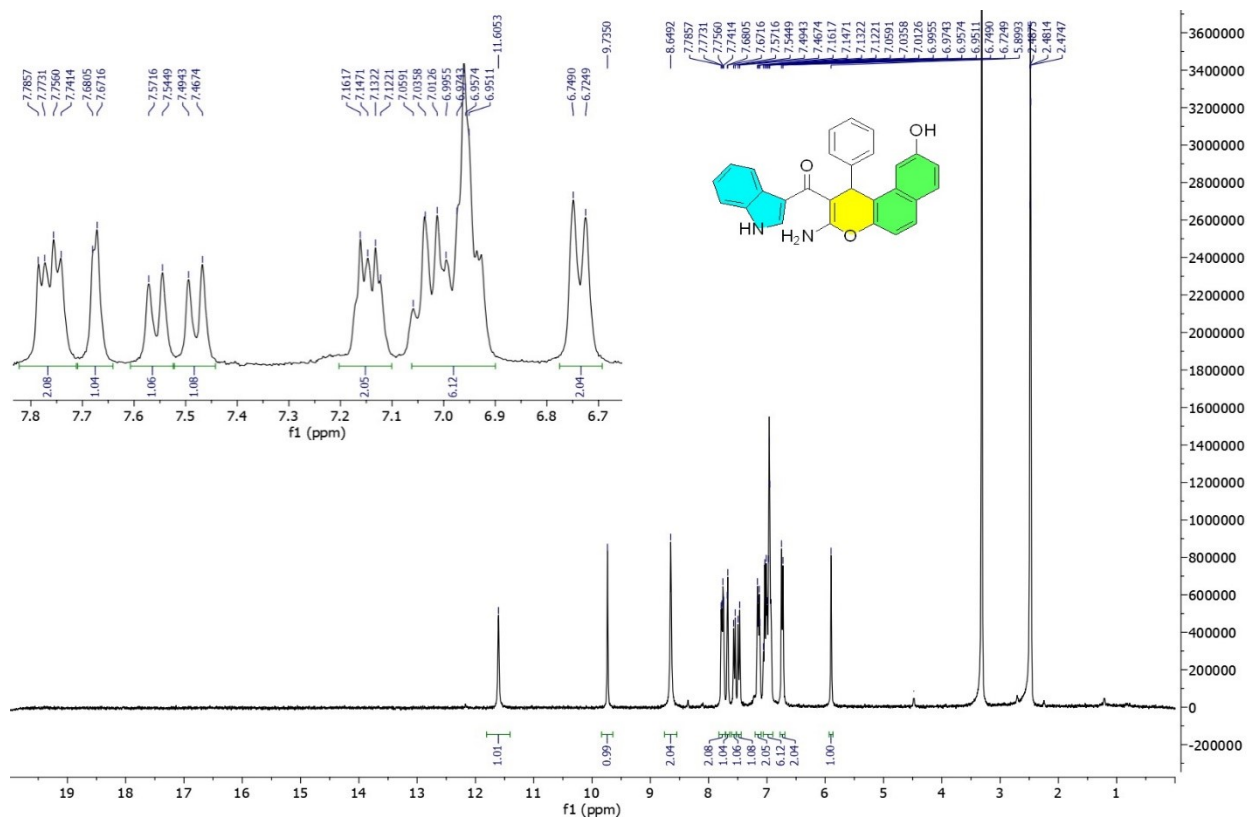

**<sup>1</sup>H-NMR spectrum of 4j (300 MHz, DMSO-*d*<sub>6</sub>)**

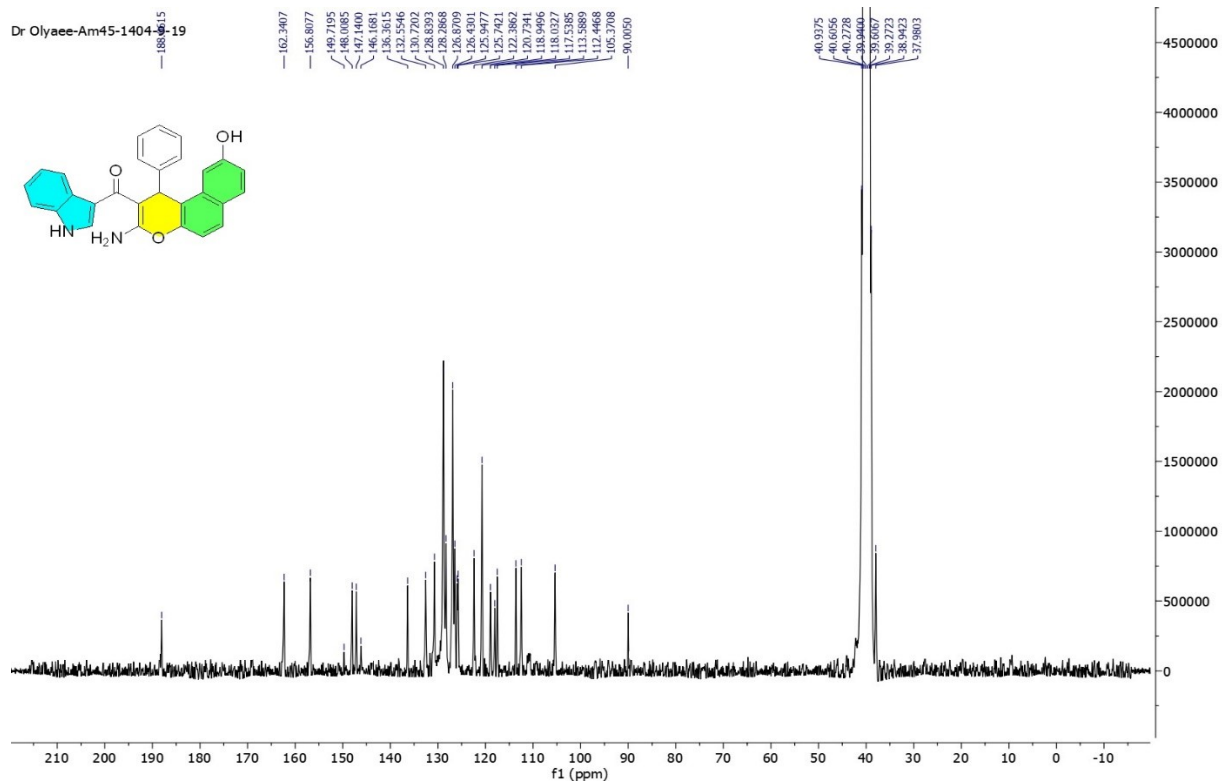

**<sup>13</sup>C-NMR spectrum of 4j (75 MHz, DMSO-*d*<sub>6</sub>)**

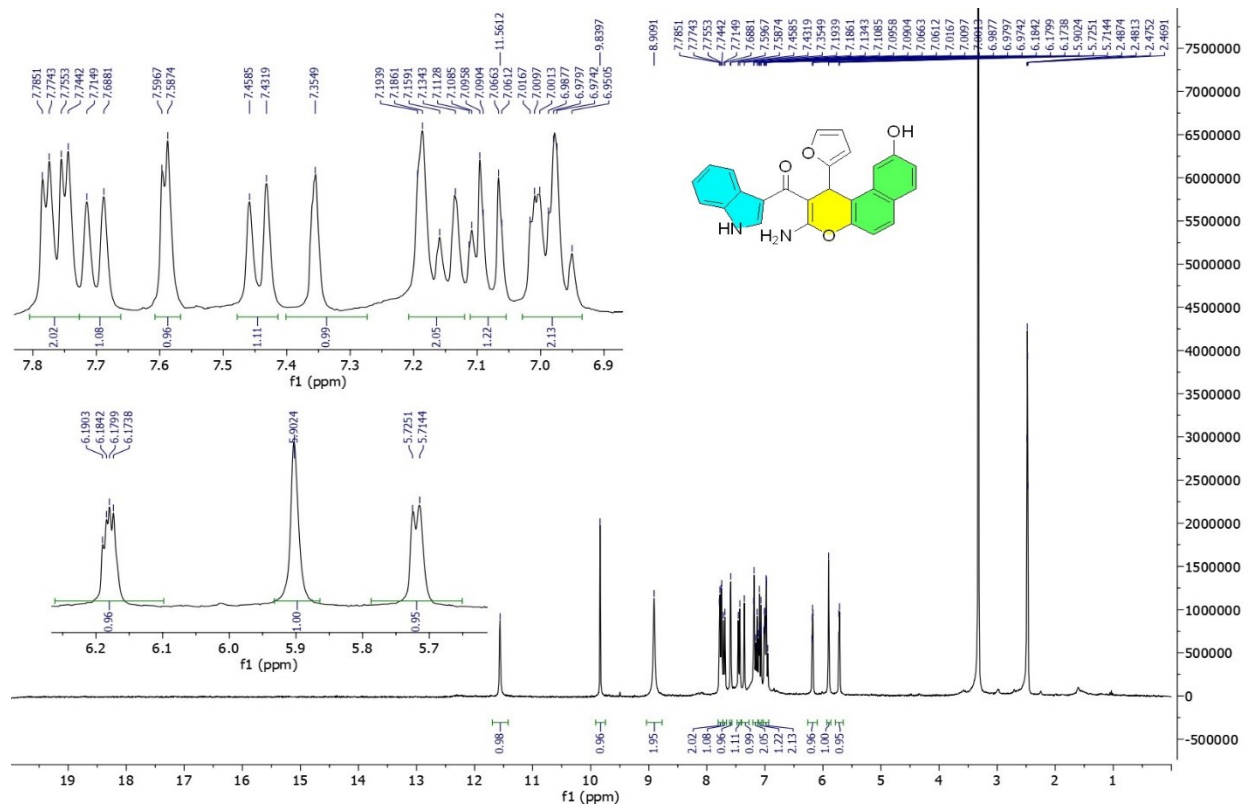

**<sup>1</sup>H-NMR spectrum of 4k (300 MHz, DMSO-*d*<sub>6</sub>)**

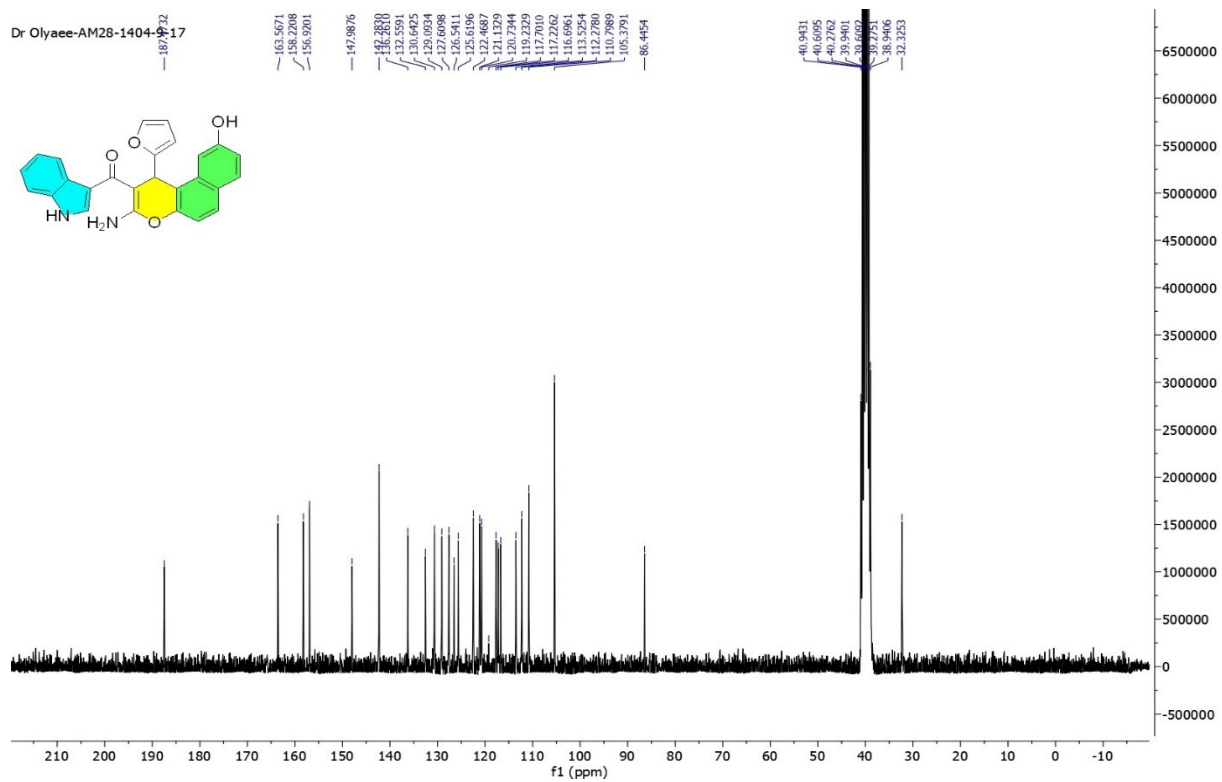

**<sup>13</sup>C-NMR spectrum of 4k (75 MHz, DMSO-*d*<sub>6</sub>)**
